# Supplementary material for: Interactions of the N-terminal domain of human islet amyloid polypeptide with lipid membranes: the effect of cholesterol
Source: Royal Society of Chemistry journal article supplement (doi:10.1039/c6ra19714k), 2016-01-01
Supplement: c6ra19714k1.pdf [file c6ra19714k1.pdf]

Electronic Supplementary Material (ESI) for RSC Advances.  
This journal is © The Royal Society of Chemistry 2016

### **Supplementary Information**

#### **Interaction of the N-terminal Domain of Human Islet Amyloid Polypeptide with Lipid Membrane: Effect of Cholesterol**

Yang Li<sup>a</sup>, Liping Guan<sup>a</sup>, Tong Lu<sup>a</sup>, Haichao Li<sup>b</sup>, Zhengqiang Li<sup>b</sup>, Fei Li<sup>\*a</sup>

<sup>a</sup> State Key Laboratory of Supramolecular Structure and Materials, Jilin University, Changchun 130012, P. R. China

<sup>b</sup> Key Laboratory for Molecular Enzymology & Engineering, The Ministry of Education, Jilin University, Changchun 130012, P. R. China

#### **Content list:**

- 1. Supplementary Figures (Fig. S1-S4)**
- 2. Supplementary Table (Table S1)**

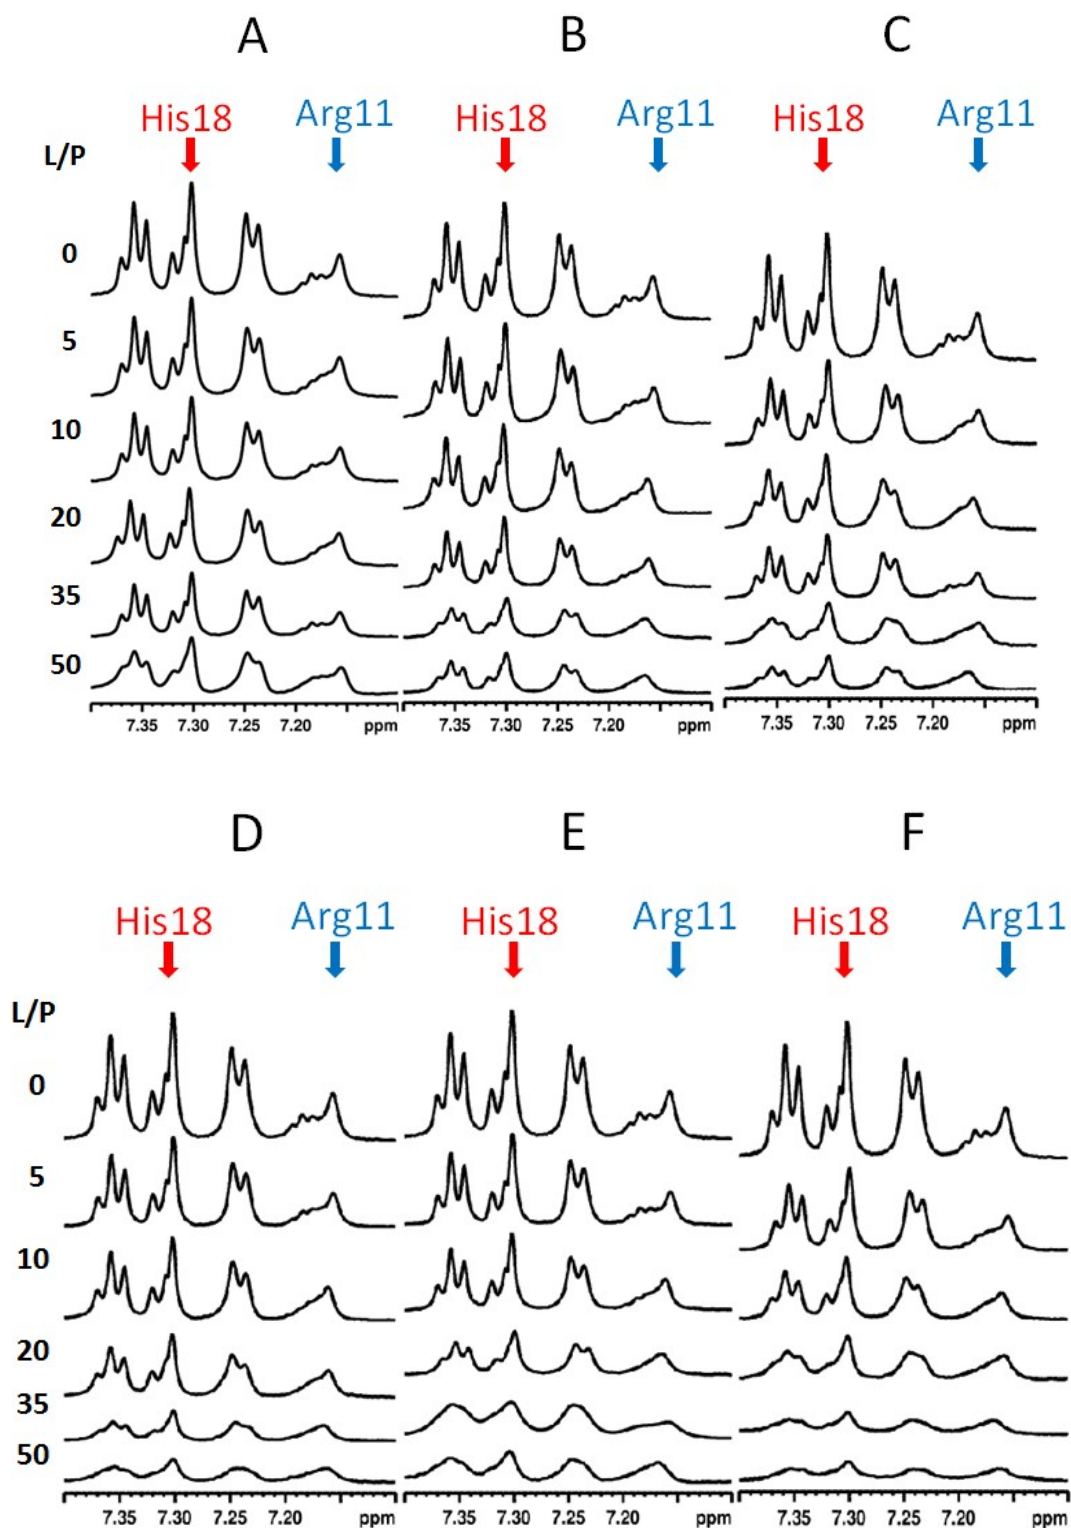

**Fig. S1**  $^1\text{H}$  NMR spectra of hIAPP<sub>1-19</sub> incorporated with DPPC SUVs at various lipid-to-peptide ratios (L/P) in the presence of Chol at the Chol percentages of 0% (A), 5% (B), 10% (C), 15% (D), 20% (E), and 30% (F). The resonance region of 7.0–7.4 ppm is displayed and the signals ( $\text{H}_\delta$  on His18 and  $\text{H}_\eta$  on Arg11) used in the calculation of the dissociation constants are indicated by arrows.

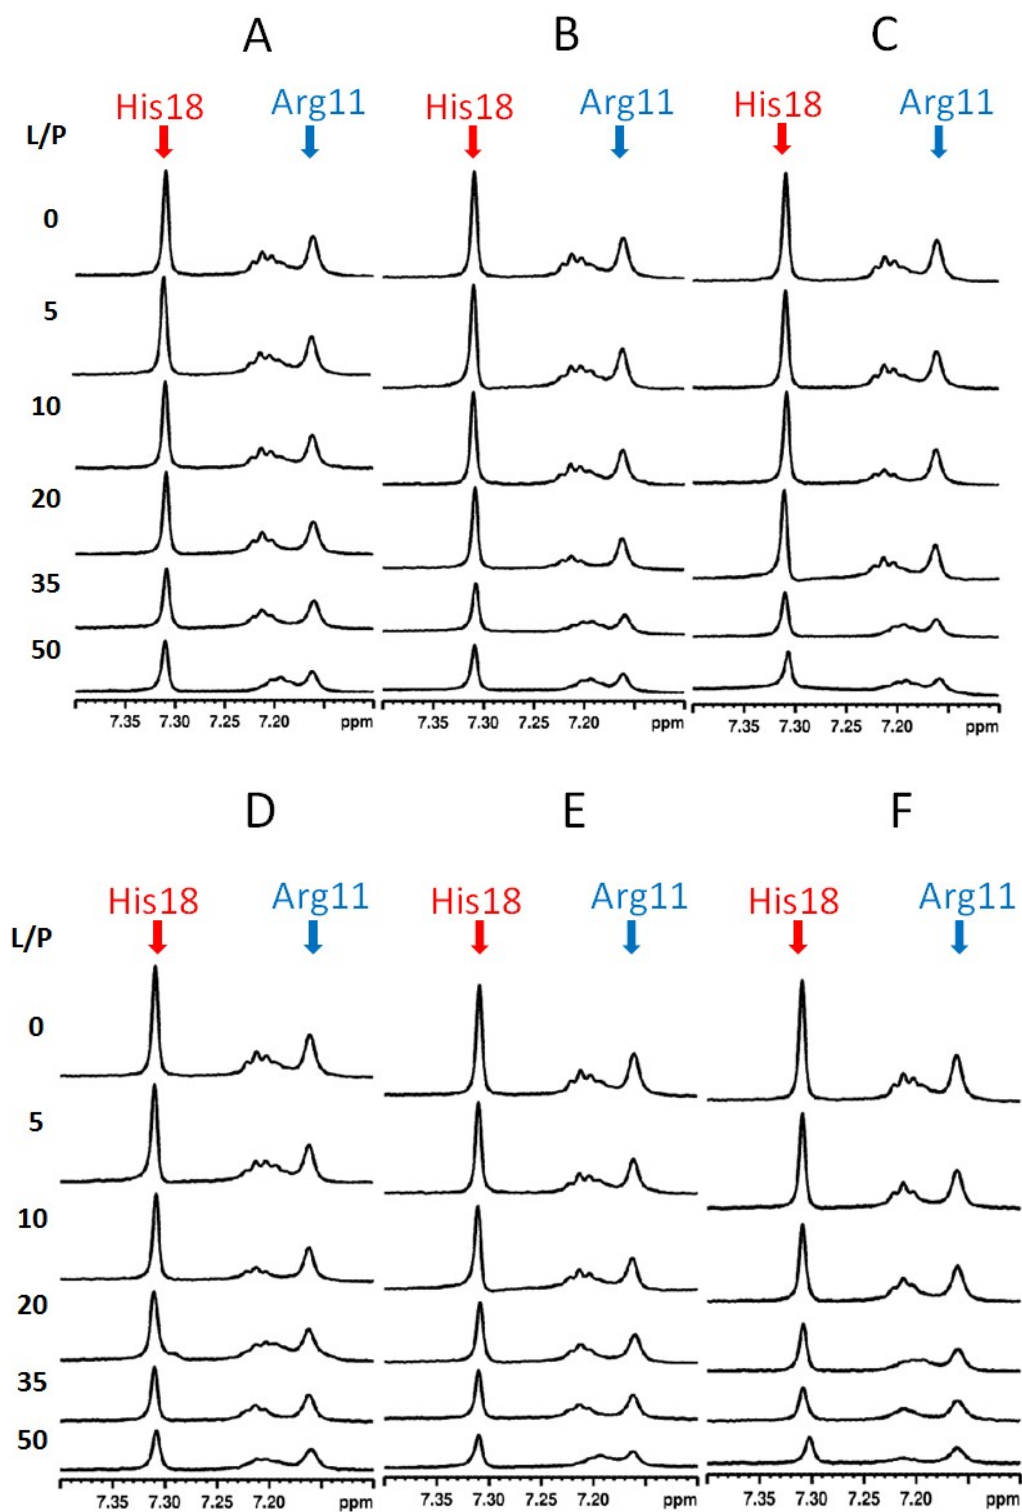

**Fig. S2**  $^1\text{H}$  NMR spectra of hIAPP<sub>1-19/F15L</sub> incorporated with DPPC SUVs at various lipid-to-peptide ratios (L/P) in the presence of Chol at the Chol percentages of 0% (A), 5% (B), 10% (C), 15% (D), 20% (E), and 30% (F). The resonance region of 7.0~7.4 ppm is displayed and the signals ( $\text{H}_\delta$  on His18 and  $\text{H}_\eta$  on Arg11) used in the calculation of the dissociation constants are indicated by arrows.

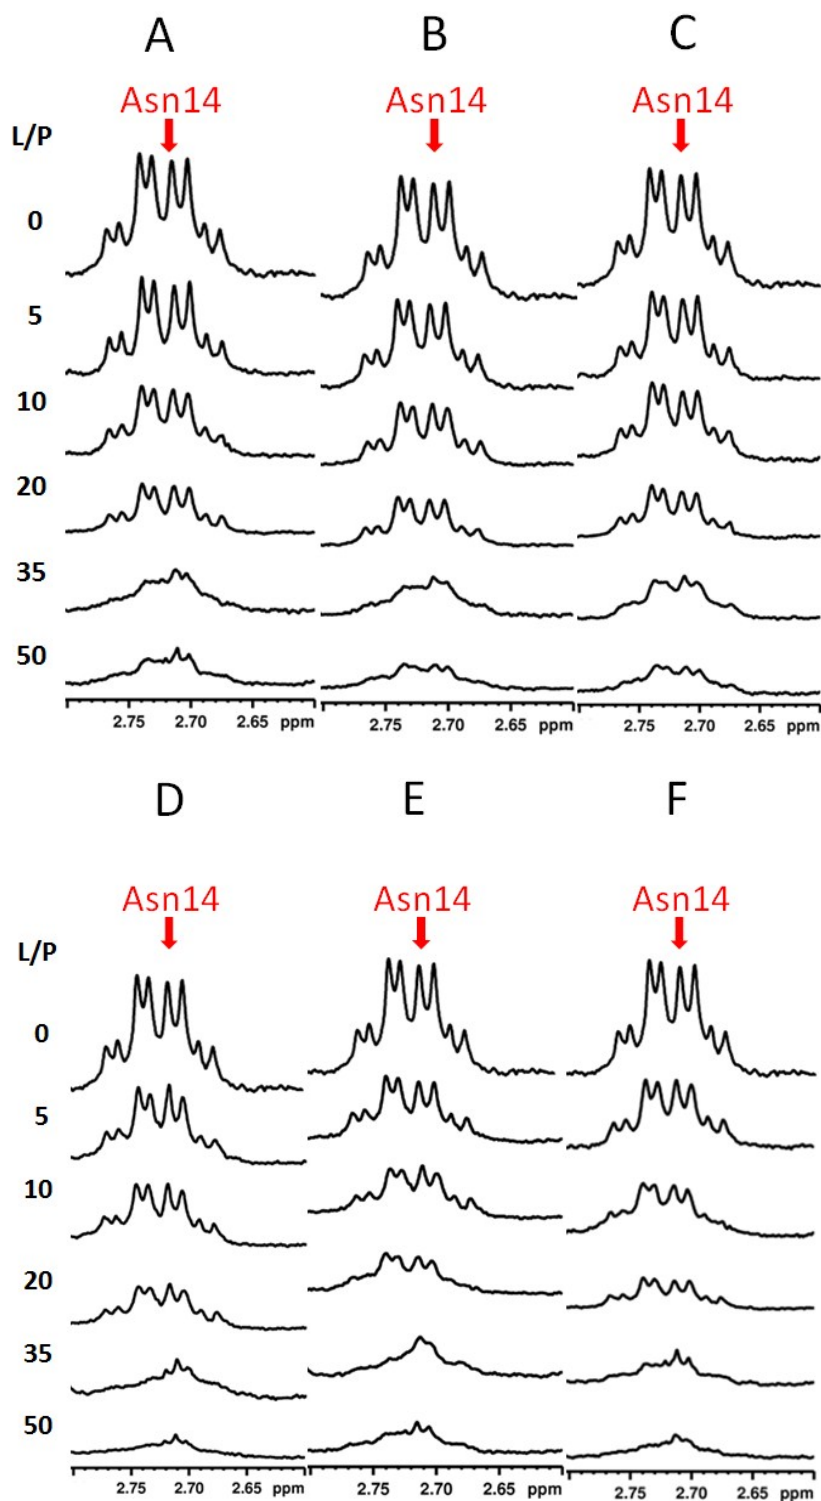

**Fig. S3**  $^1\text{H}$  NMR spectra of hIAPP<sub>1-19</sub> incorporated with DPPC SUVs at various lipid-to-peptide ratios (L/P) in the presence of Chol at the Chol percentages of 0% (A), 5% (B), 10% (C), 15% (D), 20% (E), and 30% (F). The signals in the region of 2.6–2.8 ppm, corresponding to the resonances of the  $\text{H}_\beta$  of Asn14, are displayed and used in the calculation of the dissociation constants.

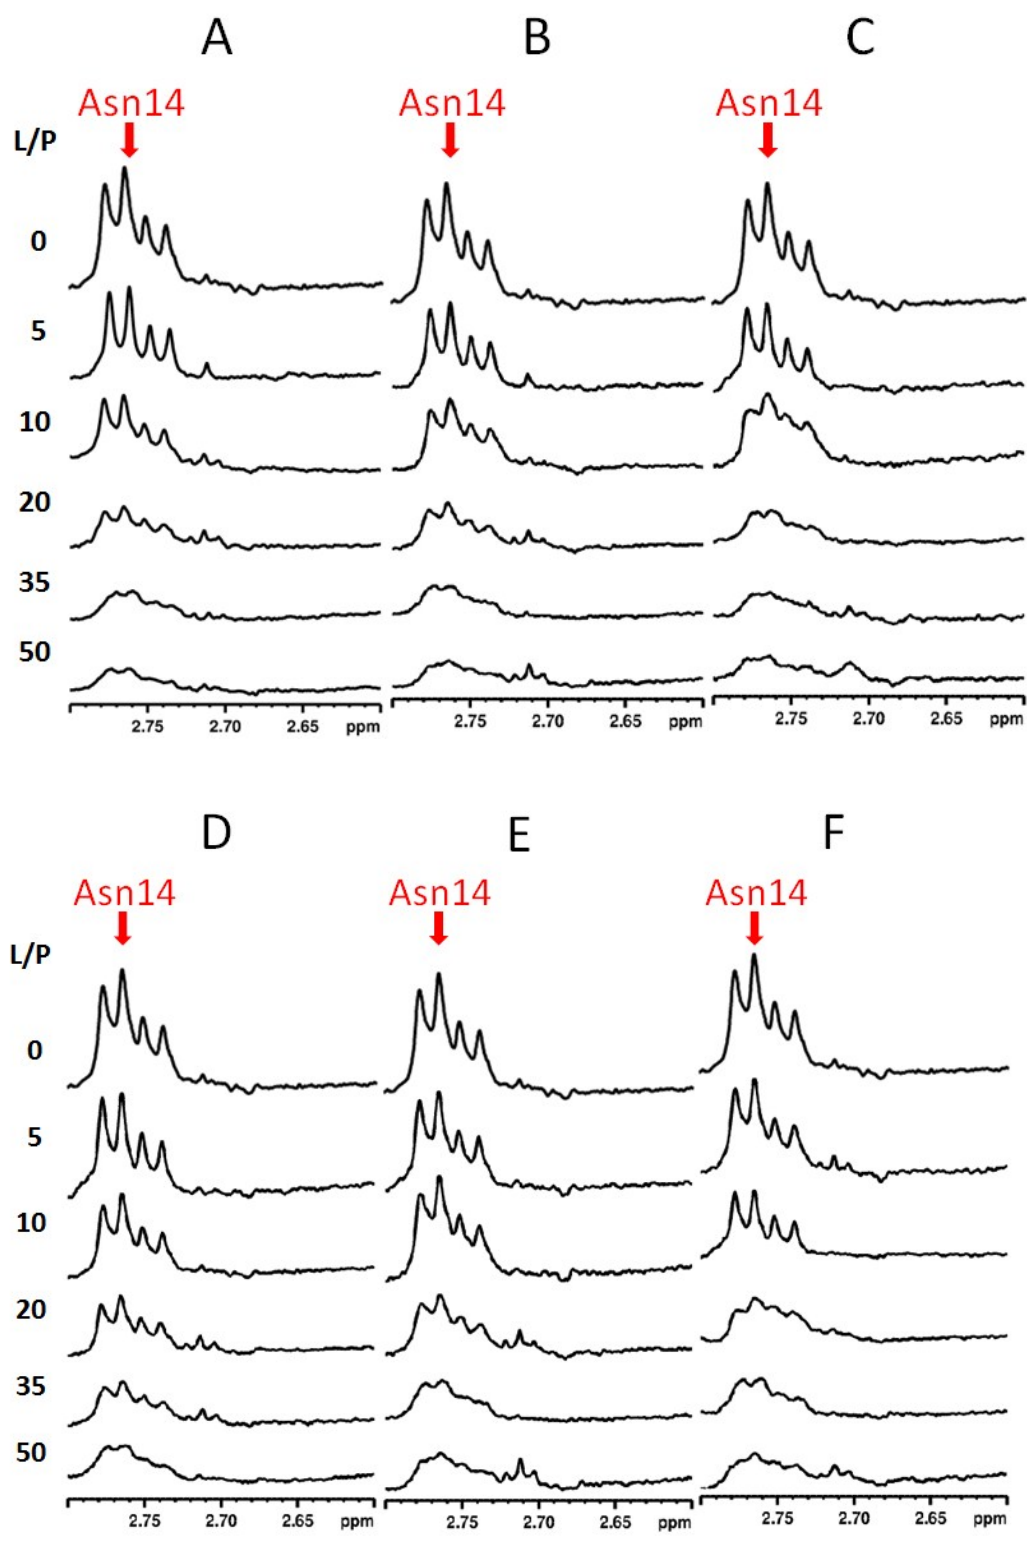

**Fig. S4**  $^1\text{H}$  NMR spectra of hIAP P<sub>1</sub>-<sup>19</sup>F<sup>15</sup>L incorporated with DPPC SUVs at various lipid-to-peptide ratios (L/P) in the

presence of Chol at the Chol percentages of 0% (A), 5% (B), 10% (C), 15% (D), 20% (E), and 30% (F). The signals in the region of 2.6–2.8 ppm, corresponding to the resonances of the H <sub>$\beta$</sub>  of Asn14, are displayed and used in the calculation of the dissociation constants.

**Table S1** The secondary structure data of hIAPP<sub>1-19</sub> and hIAPP<sub>1-19/F15L</sub> in PBS at pH 7.4

| Peptide                    | Secondary structure (%) |        |      |           |
|----------------------------|-------------------------|--------|------|-----------|
|                            | Helix                   | Strand | Turn | Unordered |
| hIAPP <sub>1-19</sub>      | 15.9                    | 19.8   | 15.1 | 49.2      |
| hIAPP <sub>1-19/F15L</sub> | 15.3                    | 21.3   | 14.9 | 48.5      |
